mately 1,200 cases were anaesthetized by me during this time. Pentothal alone was the drug used in 80 per cent of the cases; cyclopropane, with or without the addition of nitrous oxide or occasionally ether in 10 per cent; local anesthesia in 5 per cent; and intravenous morphine in 5 per cent. The cyclopropane was reserved for the penetrating wounds of the abdomen, the thoraco-abdominal wounds, and those few cases which were regarded as very bad risks and had failed to respond to resuscitative measures. It was found to be of great value in all these cases. . . . The machine used was a Rochester Lundy Heidbrink. It has travelled many hundreds of miles over bad roads and tracks, and has been packed and repacked many times without damage. Two hundred and seventy gallons of cyclopropane have been used for 120 operations. The economy in cylinders thus effected is most striking. If semi-closed nitrous oxide, oxygen, and ether had been used in these cases about 120 100-gallon cylinders of nitrous oxide would have been required instead of the three cylinders of cyclopropane of the same size."

J. C. M. C.

NIXDORF, W. B.: *Anesthesia Department Report, with Pertinent Comments*. Harper Hosp. Bull. 2: 25-29 (Apr.) 1944.

"Three significant trends have developed in the Anesthesia Department [Harper Hospital, Detroit] during the past year: 1. More extensive use of local block anesthesia with or without intravenous sodium pentothal. 2. Replacement of procaine with monocaine formate for block anesthesia. 3. Substitution of the ureteral catheter technique for the Lemmon technique in continuous spinal anesthesia. While local block anesthesia with intravenous sodium pentothal has not been too generally employed in the past, it has been

found extremely useful for a variety of reasons during the past year. In most instances, the anesthesia has been highly satisfactory, particularly in those cases which would have survived no other anesthetic procedure. It is to be remembered that the local block is the major anesthesia, while the pentothal is only a secondary analgesic agent. After premedication with more than 1/8 gr. morphine sulphate most cases have required only 15-25 cc. of a 2½ per cent solution of sodium pentothal for abdominal procedure lasting 30 to 90 minutes. . . . Replacing procaine is a relatively new local anesthetic, monocaine formate, closely related to the older monocaine hydrochloride that has been in common use by the dental profession. . . . Experience indicates that the drug is more efficient in a 1 per cent solution than any other similar agent in a 2 per cent solution. It has been used without the addition of a vaso-constrictor. Its toxicity is low, comparing favorably with that of metycaine. The duration and depth of anesthesia produced has exceeded our fondest hopes. This is of course, a tentative opinion because of the small number of cases in which it has so far been used. The drug is of no particular value for subarachnoid use since its action seems to be somewhat delayed and there is only slight increase in the duration of anesthesia. This, combined with an extremely rapid rate of diffusion in the spinal fluid, making the drug dangerous except in the most careful and adept hands, has caused us to discontinue its use for this purpose. . . . Because it has a greater margin of safety than any other cocaine derivative, procaine remains the drug of first choice for intrathecal anesthesia."

J. C. M. C.

KELLY, F. H.: *Anesthesia of Protoplasm*. J. Indiana M. A. 37: 17-28 (Jan.) 1944.
